# Supplementary material
Source: PubMed Central journal article supplement (PMC7269762)
Supplement: supp_RA119000312_154965_1_supp_491298_q70y4h.pdf [file supp_RA119000312_154965_1_supp_491298_q70y4h.pdf]

SUPPLEMENTAL INFORMATION:

**Circulating oxidized LDL increased in patients with acute myocardial infarction is accompanied by heavily modified HDL.**

Naoko Sawada<sup>a</sup>, Takashi Obama<sup>a</sup>, Shinji Koba<sup>b</sup>, Takashi Takaki<sup>c</sup>, Sanju Iwamoto<sup>d</sup>, Toshihiro Aiuchi<sup>a</sup>, Rina Kato<sup>a#</sup>, Masaki Kikuchi<sup>a</sup>, Yuji Hamazaki<sup>b</sup>, Hiroyuki Itabe<sup>a\*</sup>

a) Division of Biological Chemistry, Department of Pharmaceutical Sciences, Showa University School of Pharmacy, 1-5-8 Hatanodai, Shinagawa-ku, Tokyo 142-8555, Japan

b) Division of Cardiology, Department of Medicine, Showa University School of Medicine, 1-5-8 Hatanodai, Shinagawa-ku, Tokyo 142-8555, Japan

c) Division of Electron microscopy, Showa University School of Medicine, 1-5-8 Hatanodai, Shinagawa-ku, Tokyo 142-8555, Japan

d) Division of Physiology and Pathology, Department of Pharmacology, Toxicology and Therapeutics, Showa University School of Pharmacy, 1-5-8 Hatanodai, Shinagawa-ku, Tokyo 142-8555, Japan

**Supplemental Table S1. List of variable modifications**

| <b>Biological Modification Set</b> |               |                |
|------------------------------------|---------------|----------------|
| Modification                       | Residue       | Specificity    |
| 1 Acetyl                           |               | Protein N-term |
| 2 Acetyl                           |               | N-term         |
| 3 Acetyl                           | Lysine        |                |
| 4 Acetyl                           | Serine        |                |
| 5 AMP                              | Histidine     |                |
| 6 AMP                              | Lysine        |                |
| 7 AMP                              | Threonine     |                |
| 8 AMP                              | Tyrosine      |                |
| 9 Arg->Orn                         | Arginine      |                |
| 10 Biotin                          |               | Protein N-Term |
| 11 Biotin                          | Lysine        |                |
| 12 Bromo                           | Histidine     |                |
| 13 Bromo                           | Phenylalanine |                |
| 14 Bromo                           | Tyrosine      |                |
| 15 Bromo                           | Tryptophan    |                |
| 16 Carboxy                         | Aspartic Acid |                |
| 17 Carboxy                         | Glutamic Acid |                |
| 18 Chloro                          | Tyrosine      |                |
| 19 Cysteinylyl                     | Cysteine      |                |
| 20 Cys->Oxoalanine                 | Cysteine      |                |
| 21 Deamidated                      | Arginine      |                |
| 22 dHex                            | Asparagine    |                |
| 23 dHex                            | Serine        |                |
| 24 dHex                            | Threonine     |                |
| 25 Dibromo                         | Tyrosine      |                |
| 26 Dichloro                        | Tyrosine      |                |
| 27 Diiodo                          | Histidine     |                |
| 28 Diiodo                          | Tyrosine      |                |
| 29 Dimethyl                        | Arginine      |                |
| 30 Dimethyl                        | Lysine        |                |
| 31 Dioxidation                     | Arginine      |                |
| 32 Dioxidation                     | Lysine        |                |
| 33 Dioxidation                     | Proline       |                |
| 34 Dioxidation                     | Tyrosine      |                |
| 35 Diphthamide                     | Histidine     |                |
| 36 FAD                             | Cysteine      |                |
| 37 FAD                             | Histidine     |                |
| 38 Farnesyl                        | Cysteine      |                |
| 39 Iodo                            | Histidine     |                |
| 40 Iodo                            | Tyrosine      |                |
| 41 FormaldehydeAdduct              | Tryptophan    |                |
| 42 Formyl                          |               | Protein N-Term |
| 43 FormylMet                       |               | Protein N-Term |

**Supplemental Table S1. List of variable modifications**

| <b>Biological Modification Set (continued)</b> |               |                |
|------------------------------------------------|---------------|----------------|
| Modification                                   | Residue       | Specificity    |
| 44 Geranylgeranyl                              | Cysteine      |                |
| 45 Glucuronyl                                  |               | Protein N-Term |
| 46 Glucuronyl                                  | Serine        |                |
| 47 Glutathione                                 | Cysteine      |                |
| 48 GlyGly                                      | Lysine        |                |
| 49 Hex                                         |               | Protein N-Term |
| 50 Hex                                         | Asparagine    |                |
| 51 Hex                                         | Lysine        |                |
| 52 Hex                                         | Serine        |                |
| 53 Hex                                         | Threonine     |                |
| 54 Hex                                         | Tryptophan    |                |
| 55 Hex(1)HexNAc(1)                             | Asparagine    |                |
| 56 Hex(1)HexNAc(1)                             | Serine        |                |
| 57 Hex(1)HexNAc(1)                             | Threonine     |                |
| 58 Hex(1)HexNAc(1)NeuAc(1)                     | Asparagine    |                |
| 59 Hex(1)HexNAc(1)NeuAc(1)                     | Serine        |                |
| 60 Hex(1)HexNAc(1)NeuAc(1)                     | Threonine     |                |
| 61 Hex(1)HexNAc(1)NeuAc(2)                     | Asparagine    |                |
| 62 Hex(1)HexNAc(1)NeuAc(2)                     | Serine        |                |
| 63 Hex(1)HexNAc(1)NeuAc(2)                     | Threonine     |                |
| 64 HexNAc                                      | Asparagine    |                |
| 65 HexNAc                                      | Serine        |                |
| 66 HexNAc                                      | Threonine     |                |
| 67 Hydroxyfarnesyl                             | Cysteine      |                |
| 68 LeuArgGlyGly                                | Lysine        |                |
| 69 Lipoyl                                      | Lysine        |                |
| 70 Lys->Hydroxyallysine                        | Lysine        |                |
| 71 Methyl                                      |               | Protein N-Term |
| 72 Methyl                                      | Arginine      |                |
| 73 Methyl                                      | Asparagine    |                |
| 74 Methyl                                      | Aspartic Acid |                |
| 75 Methyl                                      | Cysteine      |                |
| 76 Methyl                                      | Glutamic Acid |                |
| 77 Methyl                                      | Glutamine     |                |
| 78 Methyl                                      | Histidine     |                |
| 79 Methyl                                      | Isoleucine    |                |
| 80 Methyl                                      | Leucine       |                |
| 81 Methyl                                      | Lysine        |                |
| 82 Methyl                                      | Serine        |                |
| 83 Methyl                                      | Threonine     |                |
| 84 Methyl                                      |               | Protein C-Term |
| 85 Methylthio                                  | Asparagine    |                |
| 86 Methylthio                                  | Aspartic Acid |                |

**Supplemental Table S1. List of variable modifications**

**Biological Modification Set** (*continued*)

| Modification           | Residue       | Specificity    |
|------------------------|---------------|----------------|
| 87 Myristoyl           | Glycine       | Protein N-Term |
| 88 Myristoyl           | Lysine        |                |
| 89 NeuAc               | Serine        |                |
| 90 NeuAc               | Threonine     |                |
| 91 NeuAc               | Asparagine    |                |
| 92 NeuGc               | Serine        |                |
| 93 NeuGc               | Threonine     |                |
| 94 NeuGc               | Asparagine    |                |
| 95 Nicotinyl           | Lysine        |                |
| 96 Nitro               | Tryptophan    |                |
| 97 Nitro               | Tyrosine      |                |
| 98 Oxidation           | Arginine      |                |
| 99 Oxidation           | Asparagine    |                |
| 100 Oxidation          | Aspartic Acid |                |
| 101 Oxidation          | Lysine        |                |
| 102 Oxidation          | Phenylalanine |                |
| 103 Oxidation          | Tyrosine      |                |
| 104 Palmitoyl          | Cysteine      |                |
| 105 Palmitoyl          | Lysine        |                |
| 106 Palmitoyl          | Serine        |                |
| 107 Palmitoyl          | Threonine     |                |
| 108 Phospho            | Arginine      |                |
| 109 Phospho            | Aspartic Acid |                |
| 110 Phospho            | Histidine     |                |
| 111 Phospho            | Lysine        |                |
| 112 Phospho            | Serine        |                |
| 113 Phospho            | Threonine     |                |
| 114 Phospho            | Tyrosine      |                |
| 115 Phosphopantetheine | Serine        |                |
| 116 Ser->Oxoalanine    | Serine        |                |
| 117 Succinyl           |               | Protein N-Term |
| 118 Sulfo              | Serine        |                |
| 119 Sulfo              | Threonine     |                |
| 120 Sulfo              | Tyrosine      |                |
| 121 Trimethyl          | Arginine      |                |
| 122 Trimethyl          | Lysine        |                |
| 123 Trioxidation       | Tyrosine      |                |
| 124 Tripalmitate       | Cysteine      | Protein N-Term |
| 125 Ammonia-loss       | Serine        | N-term         |
| 126 Ammonia-loss       | Threonine     | N-term         |

**Supplemental Table S1. List of variable modifications**

| <b>Generic Workup Modification Set (always invoked)</b> |               |             |
|---------------------------------------------------------|---------------|-------------|
| Modification                                            | Residue       | Specificity |
| 1 Delta:H(2)C(2)                                        |               | N-Term      |
| 2 Delta:H(2)C(2)                                        | Histidine     |             |
| 3 Delta:H(2)C(2)                                        | Lysine        |             |
| 4 Delta:H(4)C(2)                                        |               | N-Term      |
| 5 Delta:H(4)C(2)                                        | Histidine     |             |
| 6 Delta:H(4)C(2)                                        | Lysine        |             |
| 7 Amino                                                 | Tyrosine      |             |
| 8 Arg->GluSA                                            | Arginine      |             |
| 9 Carbamyl                                              |               | N-term      |
| 10 Carbamyl                                             | Arginine      |             |
| 11 Carbamyl                                             | Lysine        |             |
| 13 Cation:Cu[I]                                         | Aspartic Acid |             |
| 14 Cation:Cu[I]                                         | Glutamic Acid |             |
| 15 Cation:Cu[I]                                         |               | C-Term      |
| 16 Cation:K                                             | Aspartic Acid |             |
| 17 Cation:K                                             | Glutamic Acid |             |
| 18 Cation:K                                             |               | C-Term      |
| 19 Cation:Na                                            | Aspartic Acid |             |
| 20 Cation:Na                                            | Glutamic Acid |             |
| 21 Cation:Na                                            |               | C-Term      |
| 22 Cys->Dha                                             | Cysteine      |             |
| 23 Deamidated                                           | AsnOrAsp      |             |
| 24 Deamidated                                           | Asparagine    |             |
| 25 Deamidated                                           | GlnOrGlu      |             |
| 26 Deamidated                                           | Glutamine     |             |
| 27 Dehydrated                                           | Aspartic Acid |             |
| 28 Dehydrated                                           | Glutamic Acid |             |
| 29 Dehydrated                                           | Serine        |             |
| 30 Dehydrated                                           | Threonine     |             |
| 31 Dioxidation                                          | Cysteine      |             |
| 32 Dioxidation                                          | Methionine    |             |
| 33 Dioxidation                                          | Tryptophan    |             |
| 34 Formyl                                               |               | N-Term      |
| 35 Formyl                                               | Lysine        |             |
| 36 Gln->pyro-Glu                                        | Glutamine     | N-Term      |
| 37 Glu->pyro-Glu                                        | Glutamic Acid | N-Term      |
| 38 Lys->Allysine                                        | Lysine        |             |
| 39 Oxidation                                            | Cysteine      |             |
| 40 Oxidation                                            | Histidine     |             |
| 41 Oxidation                                            | Methionine    |             |
| 42 Oxidation                                            | Proline       |             |
| 43 Oxidation                                            | Tryptophan    |             |
| 44 Pro->pyro-Glu                                        | Proline       |             |

## Supplemental Table S1. List of variable modifications

### **Generic Workup Modification Set (always invoked) (continued)**

| Modification             | Residue    | Specificity |
|--------------------------|------------|-------------|
| 45 Pro->Pyrrolidinone    | Proline    | C-Term      |
| 46 Trioxidation          | Cysteine   |             |
| 47 Trioxidation          | Tryptophan |             |
| 48 Trp->Hydroxykynurenin | Tryptophan |             |
| 49 Trp->Kynurenin        | Tryptophan |             |
| 50 Dethiomethyl          | Methionine |             |
| 51 Met->Hse              | Methionine |             |

### **Iodoacetamide Cysteine Alkylation Modification Set**

| Modification      | Residue       | Specificity |
|-------------------|---------------|-------------|
| 1 Ammonia-loss    | Cysteine      | N-term      |
| 2 Carbamidomethyl |               | N-term      |
| 3 Carbamidomethyl | Aspartic Acid |             |
| 4 Carbamidomethyl | Cysteine      |             |
| 5 Carbamidomethyl | Glutamic Acid |             |
| 6 Carbamidomethyl | Histidine     |             |
| 7 Carbamidomethyl | Lysine        |             |
| 8 Carbamyl        | Methionine    |             |
| 9 Iodo            | Histidine     |             |
| 10 Iodo           | Tyrosine      |             |

### **User defined Modification Set**

| Modification                        | Residue   | Specificity |
|-------------------------------------|-----------|-------------|
| 1 acrolein addition +38             | lysine    |             |
| 2 acrolein addition +56             | lysine    |             |
| 3 acrolein addition +76             | lysine    |             |
| 4 acrolein addition +94             | lysine    |             |
| 5 acrolein addition +112            | lysine    |             |
| 6 reduced acrolein addition +lysine |           |             |
| 7 reduced acrolein addition +lysine |           |             |
| 8 reduced HNE +158                  | histidine |             |
| 9 ONE addition +154                 | lysine    |             |
| 10 hexanoyl addition +98            | lysine    |             |
| 11 HPNE addition +172               | lysine    |             |
| 12 MDA adduct +54                   | lysine    |             |
| 13 MDA adduct +62                   | lysine    |             |

**Supplemental Table S2. List of 45 species monitored by LC-MS/MS**

| m/z       | Molecular species | m/z             | Molecular species                 |
|-----------|-------------------|-----------------|-----------------------------------|
| S/MUFA-PC |                   | Long chain oxPC |                                   |
| 732.6     | 32:1              | 722.6           | 34:2+14                           |
| 734.6     | 32:0              | 774.6           | 34:2+16                           |
| 760.6     | 34:1              | 790.6           | 34:2+32                           |
| 788.6     | 36:1              | 796.6           | 36:4+14                           |
| 790.6     | 36:0              | 798.6           | 36:4+16                           |
| 678.4     | 28:0              | 814.6           | 36:4+32                           |
|           |                   | 800.6           | 36:2+14                           |
|           |                   | 802.6           | 36:2+16                           |
| PUFA-PC   |                   |                 |                                   |
| 756.6     | 34:3              | 818.6           | 36:2+32                           |
| 758.6     | 34:2              | 824.6           | 38:4+14                           |
| 780.6     | 36:5              | 826.6           | 38:4+16                           |
| 782.6     | 36:4              | 842.6           | 38:4+32                           |
| 784.6     | 36:3              |                 |                                   |
| 786.6     | 36:2              | Cleaved oxPC    |                                   |
| 806.6     | 38:6              | 594.6           | 1-palmitoyl-2-(5-oxovaleroyl) PC  |
| 808.6     | 38:5              | 610.6           | 1-palmitoyl-2-glutaroyl PC        |
| 810.6     | 38:4              | 622.6           | 1-stearoyl-2-(5-oxovaleroyl) PC   |
| 834.6     | 40:6              | 638.6           | 1-stearoyl-2-glutaroyl PC         |
| 838.6     | 40:4              | 650.6           | 1-palmitoyl-2-(9-oxo-nonanoyl) PC |
|           |                   | 664.6           | 1-palmitoyl-2-(5-oxo-octenoyl) PC |
| LysoPC    |                   | 666.6           | 1-palmitoyl-2-azelaoyl PC         |
| 496.2     | 16:0-LPC          | 692.6           | 1-stearoyl-2-(5-oxo-octenoyl) PC  |
| 524.2     | 18:0-LPC          | 706.6           | 1-stearoyl-2-(6-oxo-nonenoyl) PC  |
| 494.2     | 16:1-LPC          | 652.6           | 1-O-hexadecyl-2-azelaoyl PC       |
| 522.2     | 18:1-LPC          |                 |                                   |
| 482.2     | 16:0-LPC-alkyl    |                 |                                   |
| 510.2     | 18:0-LPC-alkyl    |                 |                                   |
